# Supplementary material for: Invitro efficacy of green synthesized silver nanoconjugates of Valeriana wallichii methanolic root extract against MDR strain of Acinetobacter baumannii
Source: Research Square preprint supplement (doi:10.21203/rs.3.rs-2549488/v1), 2023-02-10
Supplement: Supplementary file 1 [file 2e572d9bd8472b8971177374.docx]

**Supplementary File**

**Total Phenolic Content**

Graph 1: Standard curve of Gallic acid (10-50µg/ml) for Total Phenolic Content.

**Total Flavonoid Content**

Graph 2: Standard curve of quercetin (10-100µg/ml) for Total Flavonoid Content.

**Total Terpenoid Content**

Graph 3: Standard curve of Linalool (5-25 mg/ml) for Total Terpenoid Content.

**Total Tannin Content**

Graph 4: Standard curve of Gallic Acid (5-50µg/ml) for Total Tannin Content.

**Ferric Reducing Antioxidant Power**

Graph 5: Standard curve of FeSO4 (100-800µg/ml) for Ferric Reducing Antioxidant Power.

**Reducing Power Assay**

Graph 6: Standard curve of Ascorbic acid (10-100µg/ml) for Reducing Power Assay.

**DPPH Free Radical Scavenging Assay**

Graph 7: Standard curve of Ascorbic acid (0.1-1µg/ml) for DPPH Assay.

Graph 8: DPPH Assay of *V. wallichii* methanolic extract (10-50µg/ml).
