# Supplementary figures and images for: Invitro efficacy of green synthesized silver nanoconjugates of Valeriana wallichii methanolic root extract against MDR strain of Acinetobacter baumannii
Source: Research Square preprint supplement (doi:10.21203/rs.3.rs-2549488/v1), 2023-02-10

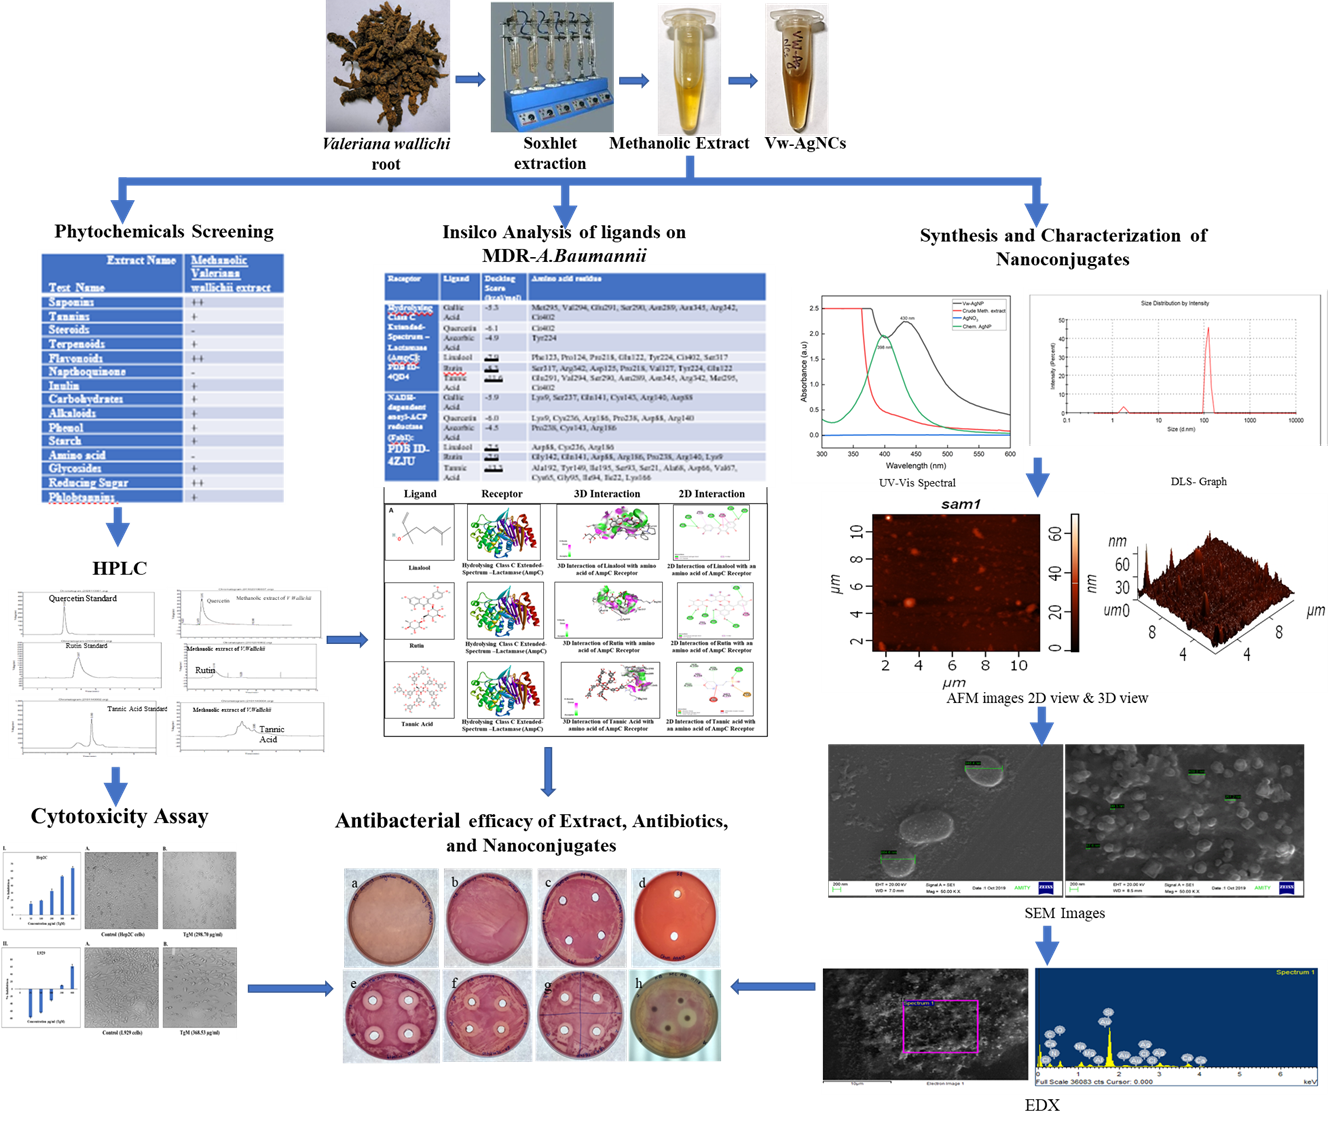

Supplement: Supplementary file 2 [file 4df52b68efdf02f1d5fc6e64.docx]
